# Supplementary material
Source: publisher site journal article supplement (https://www.dovepress.com/article/212596)
Supplement: Supplementary file 1 [file get_supplementary_file.php]

Supplemental materials:

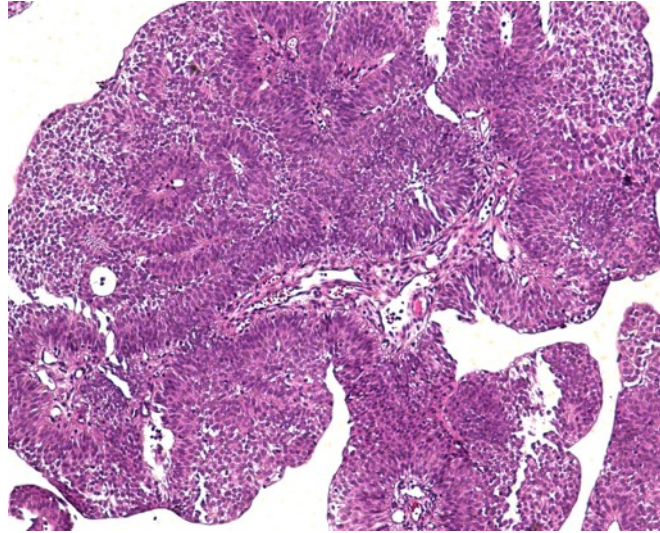

**Supplemental Figure 1. The represented pathological analysis image of clinical specimens of BC tissues**

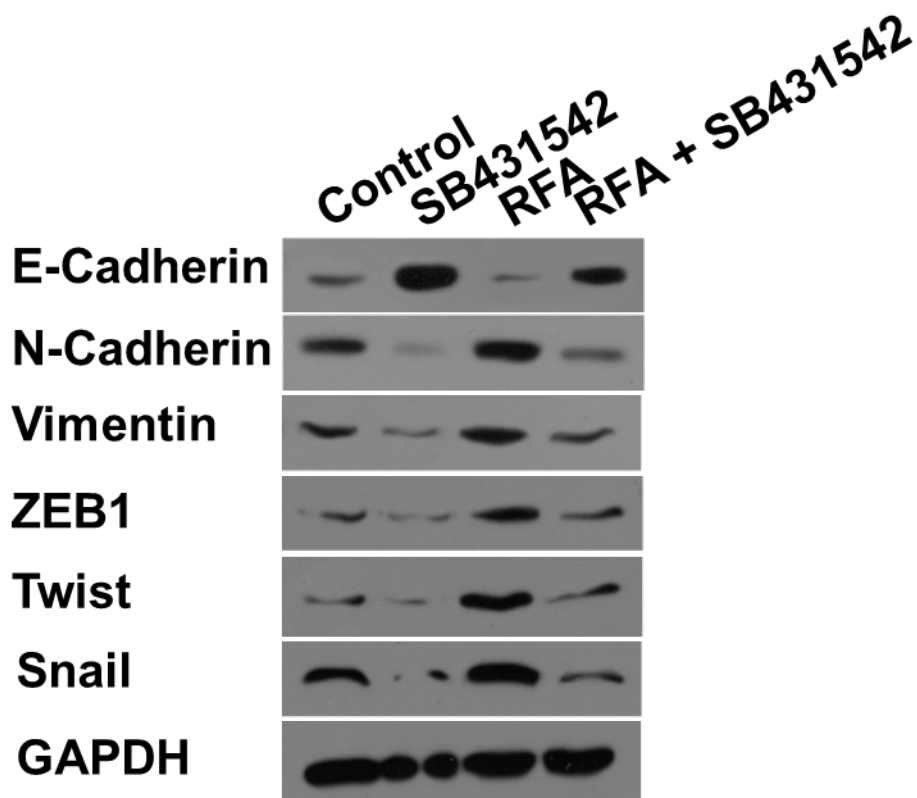

**Supplemental Figure 2. The expression of EMT-related protein in subcutaneous tumor tissues of Figure 4.** The tumor tissues were harvested for western blot experiments. The expression level of EMT-related proteins were examined by their antibodies. Results were shown as represented image of western blot (the 1<sup>st</sup> / No. 1 tumor tissue). Abbreviation: EMT, epithelial-mesenchymal transition; ZEB1, zinc finger E-box binding homeobox 1;

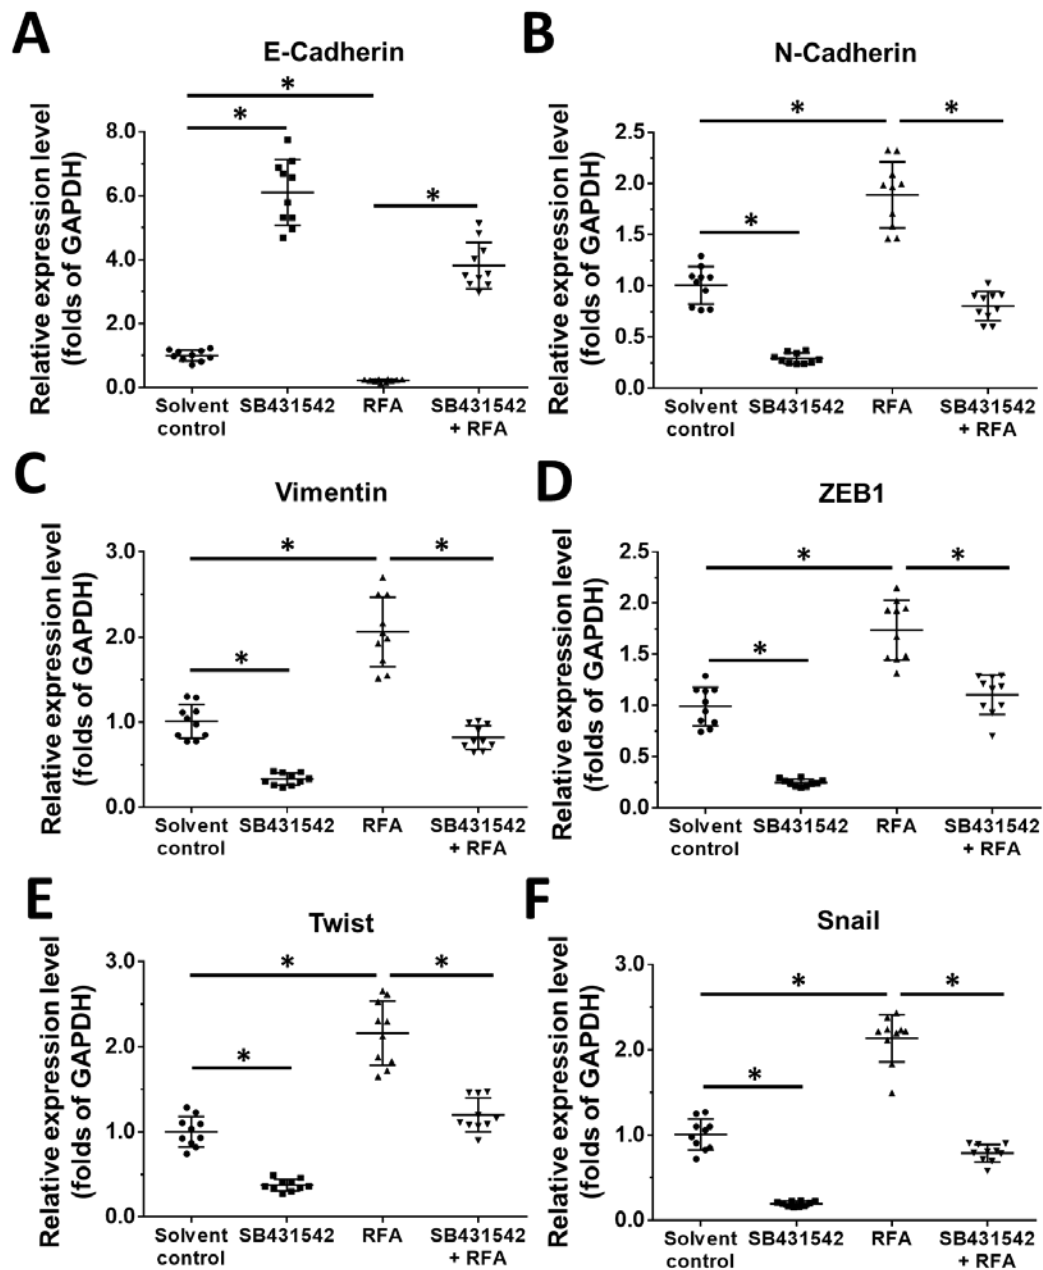

**Supplemental Figure 3. The expression of EMT-related protein in subcutaneous tumor tissues of Figure 4.** The tumor tissues were harvested for western blot experiments. The expression level of EMT-related proteins were examined by their antibodies. Results were shown as the quantitative results from all tumor tissues (E-Cadherin [A], N-Cadherin [B], Vimentin [C], ZEB1 [D], Twist [E], Snail [F]). Abbreviation: EMT, epithelial-mesenchymal transition; ZEB1, zinc finger E-box binding homeobox 1; \* $P < 0.05$

Supplemental Table 1 The  $IC_{50}$  values ( $\mu\text{mol/L}$ ) of SB431542 on the luciferase reporters of TGF $\beta$ /Smad pathway

| PDCs of BC | 3TP-Luc                                                                                                     | SBE-Luc         |
|------------|-------------------------------------------------------------------------------------------------------------|-----------------|
| PDCs       | $IC_{50}$ values ( $\mu\text{mol/L}$ ) of SB431542 on the luciferase reporters of TGF $\beta$ /Smad pathway |                 |
| No. 1      | 0.31 $\pm$ 0.08                                                                                             | 0.44 $\pm$ 0.10 |
| No. 2      | 0.20 $\pm$ 0.06                                                                                             | 0.18 $\pm$ 0.05 |
| No. 3      | 0.21 $\pm$ 0.01                                                                                             | 0.15 $\pm$ 0.06 |
| No. 4      | 0.10 $\pm$ 0.02                                                                                             | 0.11 $\pm$ 0.00 |
| No. 5      | 0.25 $\pm$ 0.09                                                                                             | 0.23 $\pm$ 0.04 |

Abbreviation: BC, Bladder cancer; PDCs, Patients-derived cells

Supplemental Table 2 The  $IC_{50}$  values ( $\mu\text{mol/L}$ ) of SB431542 on the luciferase reporters of TGF $\beta$ /Smad pathway in BC cell lines

|            | 3TP-Luc                                                                                                     | SBE-Luc         |
|------------|-------------------------------------------------------------------------------------------------------------|-----------------|
| PDCs of BC | $IC_{50}$ values ( $\mu\text{mol/L}$ ) of SB431542 on the luciferase reporters of TGF $\beta$ /Smad pathway |                 |
| T24        | 0.58 $\pm$ 0.20                                                                                             | 0.60 $\pm$ 0.08 |
| 5637       | 0.45 $\pm$ 0.11                                                                                             | 0.51 $\pm$ 0.15 |
| RT4        | 0.30 $\pm$ 0.14                                                                                             | 0.44 $\pm$ 0.13 |
